# Supplementary material
Source: publisher site journal article supplement (https://www.dovepress.com/article/378309)
Supplement: Supplementary file 1 [file get_supplementary_file.php]

**Supplemental Table 1.** Characteristics of subjects by the trajectory patterns of SII in 2006

|                                   | Low stable   | Moderate stable | Increase     | Decrease     | <i>P</i> value |
|-----------------------------------|--------------|-----------------|--------------|--------------|----------------|
| Number of subjects                | 26613        | 14254           | 2954         | 1988         | -              |
| Age, mean (SD), year              | 49.0(11.9)   | 48.5(11.5)      | 49.1(11.5)   | 47.1(10.8)   | <0.001         |
| Female, n (%)                     | 5956(22.4)   | 3692(25.9)      | 867(29.4)    | 529(26.6)    | <0.001         |
| BMI, mean (SD), kg/m <sup>2</sup> | 25.0(3.5)    | 25.2(3.5)       | 25.1(3.5)    | 24.7(3.5)    | <0.001         |
| High school or above, n (%)       | 6160(23.2)   | 3056(21.4)      | 557(18.9)    | 459(23.1)    | <0.001         |
| Income >800 yuan/month, n (%)     | 3930(14.8)   | 2033(14.3)      | 354(12.0)    | 295(14.8)    | <0.001         |
| Ever smokers, n (%)               | 10828(40.7)  | 5449(38.2)      | 1099(37.2)   | 833(41.9)    | <0.001         |
| Ever drinkers, n (%)              | 11721(44.0)  | 5826(40.9)      | 1125(38.1)   | 885(44.5)    | <0.001         |
| Active physical activity, n (%)   | 3858(14.5)   | 1695(11.9)      | 312(10.6)    | 209(10.5)    | <0.001         |
| Family history of CVD, n (%)      | 1635(6.1)    | 878(6.2)        | 181(6.1)     | 139(7.0)     | 0.504          |
| Hypertension, n (%)               | 9897(37.2)   | 5714(40.1)      | 1279(43.3)   | 694(34.9)    | <0.001         |
| Diabetes mellitus, n (%)          | 1955(7.4)    | 1197(8.4)       | 237(8.0)     | 156(7.8)     | 0.002          |
| SBP, mean (SD), mmHg              | 127.5(19.2)  | 129.0(19.9)     | 130.5(20.9)  | 126.1(18.6)  | <0.001         |
| DBP, mean (SD), mmHg              | 82.1(11.1)   | 83.1(11.4)      | 83.7(11.9)   | 81.8(10.8)   | <0.001         |
| WC, mean (SD), cm                 | 86.5(10.0)   | 86.6(9.9)       | 86.5(9.7)    | 85.4(9.5)    | <0.001         |
| FBG, mean (SD), mmol/L            | 5.35(1.48)   | 5.40(1.57)      | 5.40(1.56)   | 5.44(1.52)   | 0.001          |
| LDL-C, mean (SD), mmol/L          | 2.28(0.96)   | 2.30(0.86)      | 2.27(0.82)   | 2.32(0.88)   | 0.013          |
| Anti-hypertensive drug use, n (%) | 1976(7.42)   | 1205(8.45)      | 247(8.36)    | 171(8.60)    | <0.001         |
| Anti-diabetic drug use, n (%)     | 450(1.69)    | 263(1.85)       | 57(1.93)     | 36(1.81)     | 0.603          |
| Lipid-lowering drug use, n (%)    | 172(0.65)    | 95(0.67)        | 24(0.81)     | 12(0.60)     | 0.747          |
| SIRI, median (IQR)                | 0.49(0.37)   | 0.67(0.46)      | 0.89(0.65)   | 1.02(0.72)   | <0.001         |
| SII, median (IQR)                 | 268.8(130.6) | 388.8(151.0)    | 544.6(199.1) | 718.8(150.1) | <0.001         |

**Supplemental Table 2.** Characteristics of subjects by the trajectory patterns of SIRI in 2006

|                                   | Low stable   | Moderate stable | Increase     | Decrease     | <i>P</i> value |
|-----------------------------------|--------------|-----------------|--------------|--------------|----------------|
| Number of subjects                | 23283        | 17123           | 3051         | 2352         | -              |
| Age, mean (SD), year              | 48.5(11.6)   | 49.1(11.9)      | 49.6(12.1)   | 48.2(11.4)   | <0.001         |
| Female, n (%)                     | 7303(31.4)   | 3060(17.9)      | 321(10.5)    | 360(15.3)    | <0.001         |
| BMI, mean (SD), kg/m <sup>2</sup> | 24.8(3.4)    | 25.3(3.5)       | 25.6(3.5)    | 25.6(3.4)    | <0.001         |
| High school or above, n (%)       | 5826(25.0)   | 3444(20.1)      | 514(16.9)    | 448(19.1)    | <0.001         |
| Income >800 yuan/month, n (%)     | 3662(15.7)   | 2305(13.5)      | 351(11.5)    | 294(12.5)    | <0.001         |
| Ever smokers, n (%)               | 8350(35.9)   | 7382(43.1)      | 1368(44.8)   | 1109(47.2)   | <0.001         |
| Ever drinkers, n (%)              | 9638(41.4)   | 7592(44.3)      | 1305(42.8)   | 1022(43.5)   | <0.001         |
| Active physical activity, n (%)   | 3419(14.7)   | 2082(12.2)      | 310(10.2)    | 263(11.2)    | <0.001         |
| Family history of CVD, n (%)      | 1578(6.8)    | 984(5.8)        | 133(4.4)     | 138(5.9)     | <0.001         |
| Hypertension, n (%)               | 7829(33.6)   | 7108(41.5)      | 1550(50.8)   | 1097(46.6)   | <0.001         |
| Diabetes mellitus, n (%)          | 1609(6.9)    | 1412(8.3)       | 302(9.9)     | 222(9.4)     | <0.001         |
| SBP, mean (SD), mmHg              | 125.9(18.8)  | 129.6(19.7)     | 132.9(19.9)  | 132.8(21.7)  | <0.001         |
| DBP, mean (SD), mmHg              | 81.3(10.8)   | 83.4(11.4)      | 85.2(11.4)   | 85.1(12.3)   | <0.001         |
| WC, mean (SD), cm                 | 85.5(10.0)   | 87.4(9.9)       | 88.3(9.8)    | 87.2(9.2)    | <0.001         |
| FBG, mean (SD), mmol/L            | 5.31(1.41)   | 5.42(1.59)      | 5.47(1.70)   | 5.49(1.67)   | <0.001         |
| LDL-C, mean (SD), mmol/L          | 2.27(0.91)   | 2.30(0.91)      | 2.27(1.02)   | 2.39(0.90)   | <0.001         |
| Anti-hypertensive drug use, n (%) | 1766(7.58)   | 1363(7.96)      | 249(8.16)    | 221(9.40)    | 0.013          |
| Anti-diabetic drug use, n (%)     | 393(1.69)    | 302(1.76)       | 59(1.93)     | 52(2.21)     | 0.261          |
| Lipid-lowering drug use, n (%)    | 165(0.71)    | 101(0.59)       | 18(0.59)     | 19(0.81)     | 0.372          |
| SIRI, median (IQR)                | 0.42(0.26)   | 0.78(0.39)      | 0.86(0.52)   | 1.77(0.53)   | <0.001         |
| SII, median (IQR)                 | 282.7(154.8) | 364.0(192.5)    | 371.7(192.0) | 509.7(265.5) | <0.001         |

**Supplemental Table 3.** Incidence rates and risks of the subtypes of cardiovascular disease by the trajectory patterns of SII

|                              | Events | Incidence rate | Hazard ratio (95% CI) |                |                 |                |                 |                |
|------------------------------|--------|----------------|-----------------------|----------------|-----------------|----------------|-----------------|----------------|
|                              |        |                | Model 1               | <i>P</i> value | Model 2         | <i>P</i> value | Model 3         | <i>P</i> value |
| <b>Myocardial infarction</b> |        |                |                       |                |                 |                |                 |                |
| Low stable                   | 220    | 0.94           | 1(reference)          | -              | 1(reference)    | -              | 1(reference)    | -              |
| Moderate stable              | 124    | 0.99           | 1.10(0.88-1.37)       | 0.392          | 1.06(0.85-1.33) | 0.579          | 1.11(0.87-1.41) | 0.416          |
| Increase                     | 26     | 1.01           | 1.11(0.74-1.67)       | 0.611          | 1.06(0.71-1.60) | 0.770          | 1.17(0.72-1.89) | 0.524          |
| Decrease                     | 17     | 0.97           | 1.21(0.74-1.98)       | 0.454          | 1.14(0.70-1.88) | 0.593          | 1.34(0.70-2.60) | 0.379          |
| <b>Stroke</b>                |        |                |                       |                |                 |                |                 |                |
| Low stable                   | 1025   | 4.44           | 1(reference)          | -              | 1(reference)    | -              | 1(reference)    | -              |
| Moderate stable              | 606    | 4.92           | 1.17(1.06-1.29)       | 0.003          | 1.12(1.01-1.24) | 0.028          | 1.11(0.99-1.24) | 0.067          |
| Increase                     | 149    | 5.87           | 1.38(1.16-1.63)       | <0.001         | 1.31(1.10-1.56) | 0.002          | 1.28(1.04-1.58) | 0.020          |
| Decrease                     | 72     | 4.16           | 1.07(0.85-1.36)       | 0.560          | 1.02(0.80-1.30) | 0.873          | 0.98(0.72-1.34) | 0.912          |

**Supplemental Table 4.** Incidence rates and risks of the subtypes of cardiovascular disease by the trajectory patterns of SIRI

|                              | Events | Incidence rate | Hazard ratio (95% CI) |                |                 |                |                 |                |
|------------------------------|--------|----------------|-----------------------|----------------|-----------------|----------------|-----------------|----------------|
|                              |        |                | Model 1               | <i>P</i> value | Model 2         | <i>P</i> value | Model 3         | <i>P</i> value |
| <b>Myocardial infarction</b> |        |                |                       |                |                 |                |                 |                |
| Low stable                   | 160    | 0.78           | 1(reference)          | -              | 1(reference)    | -              | 1(reference)    | -              |
| Moderate stable              | 172    | 1.15           | 1.22(0.98-1.51)       | 0.076          | 1.19(0.96-1.48) | 0.114          | 1.04(0.81-1.35) | 0.745          |
| Increase                     | 34     | 1.29           | 1.24(0.85-1.80)       | 0.264          | 1.21(0.83-1.76) | 0.311          | 1.02(0.68-1.55) | 0.915          |
| Decrease                     | 21     | 1.03           | 1.11(0.70-1.76)       | 0.654          | 1.07(0.68-1.69) | 0.778          | 0.63(0.31-1.28) | 0.200          |
| <b>Stroke</b>                |        |                |                       |                |                 |                |                 |                |
| Low stable                   | 805    | 3.96           | 1(reference)          | -              | 1(reference)    | -              | 1(reference)    | -              |
| Moderate stable              | 773    | 5.24           | 1.17(1.05-1.29)       | 0.003          | 1.14(1.03-1.26) | 0.011          | 1.13(1.01-1.27) | 0.038          |
| Increase                     | 186    | 7.17           | 1.52(1.30-1.79)       | <0.001         | 1.47(1.25-1.73) | <0.001         | 1.47(1.23-1.75) | <0.001         |
| Decrease                     | 88     | 4.34           | 1.00(0.80-1.24)       | 0.965          | 0.95(0.76-1.19) | 0.668          | 0.93(0.67-1.30) | 0.691          |

**Supplemental Table 5.** Incidence rates and risks of the subtypes of cardiovascular disease by quartiles of annual SII increase and quartiles of average SII

|                              | Events | Incidence rate | Hazard ratio (95% CI) |                |                 |                |                 |                |
|------------------------------|--------|----------------|-----------------------|----------------|-----------------|----------------|-----------------|----------------|
|                              |        |                | Model 1               | <i>P</i> value | Model 2         | <i>P</i> value | Model 3         | <i>P</i> value |
| <b>Myocardial infarction</b> |        |                |                       |                |                 |                |                 |                |
| Annual SII increase          |        |                |                       |                |                 |                |                 |                |
| < -11.44                     | 92     | 0.91           | 1(reference)          | -              | 1(reference)    | -              | 1(reference)    | -              |
| -11.44-                      | 94     | 0.94           | 0.91(0.68-1.21)       | 0.499          | 0.91(0.68-1.21) | 0.515          | 0.90(0.66-1.23) | 0.504          |
| 13.12-                       | 90     | 0.90           | 0.87(0.65-1.16)       | 0.343          | 0.87(0.65-1.16) | 0.348          | 0.86(0.62-1.18) | 0.354          |
| ≥ 39.88                      | 111    | 1.11           | 1.11(0.84-1.46)       | 0.476          | 1.10(0.83-1.45) | 0.521          | 1.08(0.80-1.47) | 0.610          |
| Average SII                  |        |                |                       |                |                 |                |                 |                |
| < 279.87                     | 98     | 0.98           | 1(reference)          | -              | 1(reference)    | -              | 1(reference)    | -              |
| 279.87-                      | 87     | 0.86           | 0.94(0.71-1.26)       | 0.700          | 0.93(0.70-1.24) | 0.630          | 0.96(0.71-1.29) | 0.779          |
| 355.93-                      | 99     | 0.99           | 1.08(0.82-1.43)       | 0.587          | 1.04(0.79-1.38) | 0.761          | 1.10(0.80-1.50) | 0.550          |
| ≥ 446.94                     | 103    | 1.03           | 1.14(0.86-1.50)       | 0.353          | 1.08(0.82-1.42) | 0.605          | 1.18(0.81-1.72) | 0.381          |
| <b>Stroke</b>                |        |                |                       |                |                 |                |                 |                |
| Annual SII increase          |        |                |                       |                |                 |                |                 |                |
| < -11.44                     | 425    | 4.26           | 1(reference)          | -              | 1(reference)    | -              | 1(reference)    | -              |
| -11.44-                      | 424    | 4.26           | 0.90(0.79-1.04)       | 0.146          | 0.91(0.80-1.05) | 0.191          | 0.98(0.85-1.13) | 0.771          |
| 13.12-                       | 491    | 4.97           | 1.06(0.93-1.20)       | 0.411          | 1.06(0.93-1.21) | 0.387          | 1.15(0.99-1.32) | 0.064          |
| ≥ 39.88                      | 512    | 5.18           | 1.15(1.01-1.31)       | 0.037          | 1.13(0.99-1.29) | 0.060          | 1.22(1.06-1.41) | 0.005          |
| Average SII                  |        |                |                       |                |                 |                |                 |                |
| < 279.87                     | 431    | 4.34           | 1(reference)          | -              | 1(reference)    | -              | 1(reference)    | -              |
| 279.87-                      | 437    | 4.38           | 1.06(0.93-1.22)       | 0.356          | 1.05(0.92-1.20) | 0.475          | 1.07(0.93-1.23) | 0.333          |
| 355.93-                      | 452    | 4.55           | 1.12(0.98-1.28)       | 0.086          | 1.09(0.95-1.24) | 0.220          | 1.13(0.97-1.30) | 0.114          |
| ≥ 446.94                     | 532    | 5.40           | 1.35(1.18-1.53)       | <0.001         | 1.27(1.11-1.44) | <0.001         | 1.35(1.14-1.60) | 0.002          |

**Supplemental Table 6.** Incidence rates and risks of the subtypes of cardiovascular disease by quartiles of annual SIRI increase and quartiles of average SIRI

|                              | Events | Incidence rate | Hazard ratio (95% CI) |                |                 |                |                 |                |
|------------------------------|--------|----------------|-----------------------|----------------|-----------------|----------------|-----------------|----------------|
|                              |        |                | Model 1               | <i>P</i> value | Model 2         | <i>P</i> value | Model 3         | <i>P</i> value |
| <b>Myocardial infarction</b> |        |                |                       |                |                 |                |                 |                |
| Annual SIRI increase         |        |                |                       |                |                 |                |                 |                |
| < -0.0598                    | 99     | 0.98           | 1(reference)          | -              | 1(reference)    | -              | 1(reference)    | -              |
| -0.0598-                     | 95     | 0.95           | 0.96(0.72-1.27)       | 0.779          | 0.96(0.73-1.28) | 0.791          | 1.08(0.78-1.48) | 0.655          |
| -0.0014-                     | 81     | 0.81           | 0.76(0.57-1.03)       | 0.075          | 0.76(0.56-1.02) | 0.067          | 0.87(0.61-1.22) | 0.418          |
| ≥ 0.0606                     | 112    | 1.12           | 0.97(0.74-1.28)       | 0.835          | 0.98(0.74-1.28) | 0.861          | 1.12(0.81-1.56) | 0.495          |
| Average SIRI                 |        |                |                       |                |                 |                |                 |                |
| < 0.428                      | 58     | 0.57           | 1(reference)          | -              | 1(reference)    | -              | 1(reference)    | -              |
| 0.428-                       | 99     | 0.98           | 1.47(1.06-2.04)       | 0.020          | 1.44(1.04-2.00) | 0.027          | 1.42(1.02-1.97) | 0.037          |
| 0.586-                       | 103    | 1.03           | 1.40(1.01-1.94)       | 0.041          | 1.37(0.99-1.89) | 0.058          | 1.32(0.94-1.86) | 0.108          |
| ≥ 0.796                      | 127    | 1.28           | 1.59(1.16-2.18)       | 0.004          | 1.52(1.11-2.09) | 0.009          | 1.42(0.96-2.09) | 0.078          |
| <b>Stroke</b>                |        |                |                       |                |                 |                |                 |                |
| Annual SIRI increase         |        |                |                       |                |                 |                |                 |                |
| < -0.0598                    | 431    | 4.31           | 1(reference)          | -              | 1(reference)    | -              | 1(reference)    | -              |
| -0.0598-                     | 433    | 4.35           | 1.00(0.87-1.14)       | 0.965          | 1.00(0.87-1.14) | 0.971          | 1.06(0.91-1.23) | 0.428          |
| -0.0014-                     | 415    | 4.19           | 0.91(0.80-1.05)       | 0.192          | 0.91(0.79-1.04) | 0.169          | 0.98(0.84-1.15) | 0.821          |
| ≥ 0.0606                     | 573    | 5.82           | 1.21(1.07-1.37)       | 0.003          | 1.20(1.06-1.36) | 0.004          | 1.30(1.12-1.51) | 0.002          |
| Average SIRI                 |        |                |                       |                |                 |                |                 |                |
| < 0.428                      | 357    | 3.56           | 1(reference)          | -              | 1(reference)    | -              | 1(reference)    | -              |
| 0.428-                       | 416    | 4.17           | 1.06(0.92-1.22)       | 0.422          | 1.03(0.89-1.19) | 0.685          | 1.06(0.92-1.22) | 0.448          |
| 0.586-                       | 501    | 5.07           | 1.21(1.06-1.39)       | 0.006          | 1.17(1.02-1.34) | 0.025          | 1.24(1.07-1.43) | 0.005          |
| ≥ 0.796                      | 578    | 5.91           | 1.33(1.16-1.53)       | <0.001         | 1.26(1.10-1.45) | 0.002          | 1.41(1.19-1.67) | <0.001         |

**Supplemental Table 7.** Sensitivity analysis of association between the dynamic trajectory of SII and risks of cardiovascular disease

|                                                                        | Low stable   | Moderate stable | <i>P</i> value | Increase        | <i>P</i> value | Decrease        | <i>P</i> value |
|------------------------------------------------------------------------|--------------|-----------------|----------------|-----------------|----------------|-----------------|----------------|
| <b>Sex</b>                                                             |              |                 |                |                 |                |                 |                |
| Male                                                                   | 1(reference) | 1.13(1.01-1.26) | 0.029          | 1.25(1.02-1.54) | 0.010          | 1.02(0.76-1.39) | 0.035          |
| Female                                                                 | 1(reference) | 1.00(0.74-1.34) | 0.981          | 1.24(0.74-2.10) | 0.416          | 1.04(0.49-2.21) | 0.916          |
| <b>Age</b>                                                             |              |                 |                |                 |                |                 |                |
| < 50 years                                                             | 1(reference) | 1.11(0.93-1.33) | 0.246          | 1.30(0.94-1.81) | 0.115          | 1.02(0.65-1.61) | 0.924          |
| ≥ 50 years                                                             | 1(reference) | 1.12(0.99-1.27) | 0.069          | 1.24(0.98-1.58) | 0.072          | 1.05(0.74-1.51) | 0.774          |
| <b>Exclude incident events during the first two years of follow-up</b> |              |                 |                |                 |                |                 |                |
|                                                                        | 1(reference) | 1.10(0.99-1.24) | 0.082          | 1.18(0.95-1.46) | 0.134          | 0.96(0.71-1.31) | 0.811          |

**Supplemental Table 8.** Sensitivity analysis of association between the dynamic trajectory of SIRI and risks of cardiovascular disease

|                                                                        | Low stable   | Moderate stable | <i>P</i> value | Increase        | <i>P</i> value | Decrease        | <i>P</i> value |
|------------------------------------------------------------------------|--------------|-----------------|----------------|-----------------|----------------|-----------------|----------------|
| <b>Sex</b>                                                             |              |                 |                |                 |                |                 |                |
| Male                                                                   | 1(reference) | 1.16(1.04-1.30) | 0.010          | 1.35(1.13-1.60) | 0.002          | 0.86(0.63-1.19) | 0.373          |
| Female                                                                 | 1(reference) | 0.82(0.58-1.14) | 0.240          | 2.24(1.34-3.75) | 0.002          | 1.08(0.42-2.78) | 0.872          |
| <b>Age</b>                                                             |              |                 |                |                 |                |                 |                |
| < 50 years                                                             | 1(reference) | 1.16(0.96-1.41) | 0.130          | 1.35(1.00-1.81) | 0.050          | 0.83(0.49-1.41) | 0.502          |
| ≥ 50 years                                                             | 1(reference) | 1.13(0.99-1.29) | 0.067          | 1.43(1.17-1.74) | <0.001         | 0.94(0.65-1.36) | 0.754          |
| <b>Exclude incident events during the first two years of follow-up</b> |              |                 |                |                 |                |                 |                |
|                                                                        | 1(reference) | 1.10(0.97-1.23) | 0.127          | 1.31(1.09-1.58) | 0.004          | 0.88(0.63-1.23) | 0.459          |



**Supplemental Table 9.** Sensitivity analysis of association between the dynamic status of SII and risks of cardiovascular disease after excluding subjects with hypothyroidism, liver and kidney diseases and hematological diseases

|                            | Hazard ratio (95% CI) |                |                 |                |                 |                |
|----------------------------|-----------------------|----------------|-----------------|----------------|-----------------|----------------|
|                            | Model 1               | <i>P</i> value | Model 2         | <i>P</i> value | Model 3         | <i>P</i> value |
| <b>SII</b>                 |                       |                |                 |                |                 |                |
| Low stable                 | 1(reference)          | -              | 1(reference)    | -              | 1(reference)    | -              |
| Moderate stable            | 1.16(1.06,1.28)       | 0.001          | 1.12(1.02,1.23) | 0.017          | 1.11(1.00,1.23) | 0.042          |
| Increase                   | 1.33(1.14,1.57)       | <0.001         | 1.27(1.08,1.49) | 0.003          | 1.25(1.03,1.52) | 0.023          |
| Decrease                   | 1.12(0.90,1.39)       | 0.322          | 1.06(0.85,1.31) | 0.608          | 1.03(.078,1.37) | 0.819          |
| <b>Annual SII increase</b> |                       |                |                 |                |                 |                |
| < -11.44                   | 1(reference)          | -              | 1(reference)    | -              | 1(reference)    | -              |
| -11.44-                    | 0.91(0.80,1.03)       | 0.128          | 0.92(0.81,1.04) | 0.168          | 0.98(0.85,1.11) | 0.712          |
| 13.12-                     | 1.02(0.91,1.16)       | 0.694          | 1.03(0.91,1.16) | 0.655          | 1.10(0.97,1.26) | 0.147          |
| ≥ 39.88                    | 1.12(1.00,1.27)       | 0.053          | 1.11(0.99,1.25) | 0.078          | 1.19(1.05,1.36) | 0.008          |
| <b>Average SII</b>         |                       |                |                 |                |                 |                |
| < 279.87                   | 1(reference)          | -              | 1(reference)    | -              | 1(reference)    | -              |
| 279.87-                    | 1.05(0.92,1.18)       | 0.481          | 1.03(0.91,1.17) | 0.632          | 1.05(0.92,1.19) | 0.459          |
| 355.93-                    | 1.13(1.00,1.27)       | 0.051          | 1.09(0.97,1.23) | 0.156          | 1.13(0.99,1.29) | 0.079          |
| ≥ 446.94                   | 1.32(1.17,1.48)       | <0.001         | 1.25(1.11,1.40) | <0.001         | 1.32(1.13,1.55) | 0.001          |

**Supplemental Table 10.** Sensitivity analysis of association between the dynamic status of SIRI and risks of cardiovascular disease after excluding subjects with hypothyroidism, liver and kidney diseases and hematological diseases

|                             | Hazard ratio (95% CI) |                |                 |                |                 |                |
|-----------------------------|-----------------------|----------------|-----------------|----------------|-----------------|----------------|
|                             | Model 1               | <i>P</i> value | Model 2         | <i>P</i> value | Model 3         | <i>P</i> value |
| <b>SIRI</b>                 |                       |                |                 |                |                 |                |
| Low stable                  | 1(reference)          | -              | 1(reference)    | -              | 1(reference)    | -              |
| Moderate stable             | 1.18(1.08,1.30)       | <0.001         | 1.16(1.06,1.27) | 0.002          | 1.12(1.01,1.25) | 0.033          |
| Increase                    | 1.48(1.27,1.72)       | <0.001         | 1.43(1.23,1.66) | <0.001         | 1.38(1.17,1.63) | <0.001         |
| Decrease                    | 1.04(0.85,1.27)       | 0.704          | 1.00(0.82,1.22) | 0.994          | 0.89(0.66,1.20) | 0.446          |
| <b>Annual SIRI increase</b> |                       |                |                 |                |                 |                |
| < -0.0598                   | 1(reference)          | -              | 1(reference)    | -              | 1(reference)    | -              |
| -0.0598-                    | 0.97(0.86,1.10)       | 0.656          | 0.97(0.86,1.10) | 0.632          | 1.04(0.91,1.20) | 0.531          |
| -0.0014-                    | 0.87(0.77,0.99)       | 0.032          | 0.87(0.77,0.98) | 0.025          | 0.95(0.82,1.10) | 0.478          |
| ≥ 0.0606                    | 1.15(1.02,1.29)       | 0.020          | 1.14(1.01,1.28) | 0.027          | 1.25(1.09,1.44) | 0.002          |
| <b>Average SIRI</b>         |                       |                |                 |                |                 |                |
| < 0.428                     | 1(reference)          | -              | 1(reference)    | -              | 1(reference)    | -              |
| 0.428-                      | 1.10(0.96,1.25)       | 0.165          | 1.07(0.94,1.22) | 0.325          | 1.09(0.95,1.24) | 0.229          |
| 0.586-                      | 1.23(1.08,1.40)       | 0.002          | 1.19(1.05,1.35) | 0.008          | 1.23(1.07,1.41) | 0.003          |
| ≥ 0.796                     | 1.36(1.20,1.54)       | <0.001         | 1.29(1.14,1.47) | <0.001         | 1.38(1.18,1.62) | <0.001         |
